# Supplementary material for: Clinical Outcomes and Patient Experience of Biosimilar to Biosimilar Infliximab Switching in Patients with Inflammatory Bowel Disease: A Prospective, Single-Centre, Phase IV Interventional Study with a Nested Qualitative Study
Source: Hindawi journal article supplement (doi:10.1155/2023/1248526), 2023-08-25
Supplement: f1 [file 1248526.f1.doc]

Clinical outcomes and patient experience of biosimilar to biosimilar infliximab switching in patients with inflammatory bowel disease: a prospective, single-centre, phase IV interventional study with a nested qualitative study

**Supplementary data**

**Authors:**

Clare Harris1,2

Richard James Harris1,2

David Young1,2

Martin McDonnell1,2

Bridget Clancy3

Justin Harvey4

Carlos Araujo5

Ines Iria5

Joao Goncalves5

Susan Latter3*

J R Fraser Cummings1,2*

1 Department of Gastroenterology, University Hospital Southampton NHS Foundation Trust, Southampton, UK

2 Faculty of Medicine, University of Southampton, Southampton, UK

3 School of Health Sciences, University of Southampton, Southampton, UK

4 Department of Statistics and Actuarial Science, University of Stellenbosch, Stellenbosch, South Africa

5 iMed – Research Institute for Medicines, Department of Pharmacy, University of Lisbon, Portugal

* Joint senior authors

**Supplement A: Materials and methods**

### Infliximab levels and immunogenicity

Infliximab serum concentrations were measured using an in-house enzyme-linked immunosorbent assay (ELISA). The limit of detection was 0.014 mg/L, and the lower limit of quantification was 0.04mg/L. Serum concentrations of antibodies to infliximab (ATI) were analysed using a bridging ELISA with acidic treatment, which was also capable of detecting anti-drug antibodies (ADA) in the presence of the drug. Briefly, infliximab (0.5 mg/mL) was added to ELISA plates (Nunc, Denmark). Serum was added and incubated for 60 minutes at room temperature. After washing, the plates were incubated with biotin-labeled infliximab for one hour at room temperature followed by addition of streptavidin-HRP (Thermo Scientific, USA)(45). The reaction was developed with TMB (Thermo Scientific, USA) substrate and stopped with 2M H2SO4. Absorbances were read at 450/540nm and the results were expressed as µg/ml after normalisation using a standard curve of mouse anti-human antibody (Abcam, UK). The assay’s cut-off level for detection of anti-Remicade antibodies was 1µg/mL.

Sera samples containing ADAs for infliximab were compared for the presence of IgG1, IgG2, IgG3 and IgG4. The levels of these antibodies for each subclass were assessed using an adapted ELISA. In this assay, pre-coated plates with the anti-IgG4 antibody (Thermo Scientific, USA) were incubated with 1/10 diluted ADA. After washing, plates were similarly incubated with biotin-labeled infliximab for one hour at room temperature followed by addition of streptavidin-HRP. The reaction was developed with TMB substrate and stopped with 2M H2SO4. Absorbances were registered at 450/540nm, and the results were expressed as µg/ml after normalisation using a standard curve of mouse anti-human antibody.

### Cytokine profiles

For cytokine analysis we thawed the samples upon receipt, centrifuged the plasma samples and prepared aliquots of 70 to 125μl that were refrozen at −80°C until testing. Thus, all samples had the same freeze-thaw history at the time of testing in each laboratory. We used a Luminex/Bio-Plex instrument that was validated using a Bio-Plex validation kit within two weeks of each assay and calibrated on assay days using a Bio-Plex or Luminex validation kit. Each assay was performed strictly according to the manufacturer's protocol for serum or plasma samples, utilising recommended sample dilutions and standard curve concentrations, with all samples and standards assayed in duplicate. For Luminex assays, thawed aliquots were gently vortexed and then centrifuged at 13,200rpm for ten minutes at 4°C immediately prior to testing. Luminex data were analysed using Bio-Plex Manager software version 4.1 (Bio-Rad).

**Supplement B: Topic guides for qualitative interviews**

**Notes for ethics committee:**

The aim of this interview is to explore the patient experience of switching from one biosimilar of infliximab to another biosimilar. The interviews will be in-depth and semi-structured. The purpose of this guide is to ensure that all relevant issues are covered and to act as a prompt to sections that haven’t been. The intention is that the conversation will flow naturally and that one question will lead to another and this may not be in the exact order set out in this guide.

We intend on collecting qualitative data from a purposive sample of approximately 20-25 subjects or to the point of data saturation being achieved. In this cohort there will be subjects who have already been through a switch in their infliximab treatment (from originator infliximab to a biosimilar) and those who have never experienced this and we aim to capture the views of both these groups.

This will be done after week 16/18 (depending on the infusion regimen the patient is on). This time point was selected as it will have given the subjects ample experience of the switching process, having had 3/4 infusions by that point, but still be close enough to the starting point for them to reflect on the switch.

We plan to also collect qualitative data from any subject who discontinues SB2 prematurely due to patient choice (versus clinician choice). The aim of these interviews is to explore the reasons why these decisions are made and whether there is anything we can learn from these experiences to guide managed switching programmes in the future.

**Duration:**

Up to one hour

**Introduction:**

Re-confirm consent to participate (written consent will have been obtained on recruitment)

Explain role of interviewer:

“My role here is as a research student. My background is that I am a specialist doctor in gastroenterology with experience in inflammatory bowel disease. I am frequently involved in the medical care of patients with IBD and prescribing medications such as infliximab.

However, my role today is to understand *your* experience of this situation - having your medication switched. It is important for you to understand that there are no right or wrong answers and I am purely interested in your thoughts and views. All your responses will remain anonymised and have no bearing on your ongoing clinical care.”

Confirm consent to audio record and turn on audio recorder.

“I may take occasional notes to remind myself to ask you something instead of interrupting you.”

**TOPIC GUIDE FOR INTERVIEW TO EXPLORE THE SWITCHING EXPERIENCE FROM CT-P13 TO SB2 IN PATIENTS WITH ULCERATIVE COLITIS (UC) OR CROHN’S DISEASE (CD)**

**Questions:**

**Can you tell me your thoughts on the information that was provided to you regarding this planned switch of your infusion and how this was discussed with** **you?**

If not volunteered – specifically probe about;

- How information was communicated?
- Clarity of information?
- Timing?
- What worked well?
- Were there any major problems?
- How could we improve this process?
- Did it matter to you who gave you the information?

**Were you given the opportunity to discuss this? Was this important to you?**

**Have you previously been involved in a switch from one type of infliximab to another? Can you tell me your experience of that?**

If not volunteered – specifically probe about;

- How this switch related to the first experience of switching to a biosimilar?
- Would you have liked further information since you first switched?
- In what format and why?
- Was it easier to switch this time given you have had previous experience? Or conversely, was it harder because of your previous experience?
- What aspects of the previous switch made you willing to switch again this time?

**What is your understanding of ‘biosimilars’?**

**Do you have any concerns about this switch?**

If not volunteered –

- Specifically probe about safety, efficacy.
- Any concerns about disease flares following the switch if currently in remission?

**Do you see/have you experienced any major positive benefits to this switch?**

**If there is a cost saving from switching do you have any strong views on where this should be invested in the NHS?**

**Given your experience over the last 3-4 months, what would your views be on being asked to switch your medication again in the future?**

**Of all the information that you were given, which parts do you think would be most useful for other patients who are being asked to switch medicines in usual clinical practice in the future when they are NOT part of a research trial?**

**Ending**

Is there anything else you would like to tell me today?

Turn off recorder.

Thank you.

**TOPIC GUIDE FOR SUBJECTS WHO DISCONTINUED EARLY DURING THE TRIAL PERIOD DUE TO PATIENT CHOICE**

**Questions:**

**Can you tell me your thoughts on the information that was provided to you regarding this planned switch of your infusion and how this was discussed with** **you?**

If not volunteered – specifically probe about;

- How information was communicated?
- Clarity of information?
- Timing?
- What worked well?
- Were there any major problems?
- How could we improve this process?

**Were you given the opportunity to discuss this? Was this important to you?**

**What is your understanding of ‘biosimilars’?**

**What were your reasons for wanting to stop this particular medication?**

If not volunteered –

- Probe about side effects, relapse of disease?
- Ask about severity of these and effects on day to day life.
- Do you attribute these changes to the new infusion? Could there be any other causes?
- Do you see stopping this medication as the only option?

**Have you had similar problems previously with biologic medication used for IBD? Can you tell me your experiences of this?**

**Have you previously been involved in a switch from one type of infliximab to another? Can you tell me your experience of that?**

If not volunteered – specifically probe about;

- Was your experience good or bad?
- How did this switch relate to the first experience of switching to a biosimilar?
- Was it easier to switch this time given you have had previous experience? Or conversely, was it harder because of your previous experience?
- What aspects of the previous switch made you willing to switch again this time?

**Did you have any concerns prior to the switch? Did you discuss these with anyone? Were they acknowledged?**

If not volunteered –

- Specifically probe about safety, efficacy.
- Any concerns about disease flares following the switch if they were in remission at the time of the switch?

**Did you predict that this may happen and that you may have to stop the medication?**

**Have there been any positive aspects to this switch for you?**

**Given your experience over the last 3-4 months, what would your views be on being asked to switch your medication again in the future?**

If subjects states that they would be unwilling based on this experience – **Is there anything that would help you to reconsider this? If so, what? Can you explain a bit more for me?**

Consider things such;

- Further information/reassurance.
- By whom?
- At what time point in the process?
- In what format?

**Of all the information that you were given, which parts do you think would be most useful for other patients who are being asked to switch medicines in usual clinical practice in the future when they are NOT part of a research trial?**

**Ending**

Is there anything else you would like to tell me today?

Turn off recorder.

Thank you.

**TOPIC GUIDE FOR SUBJECTS WHO DECLINED TO TAKE PART IN THE SWITCH FROM CTP-13 TO SB2 FROM THE OUTSET DUE TO THEIR OWN CHOICE**

**Questions:**

**Can you tell me your thoughts on the information that was provided to you regarding the planned switch from one brand of Infliximab to the other and how this was discussed with** **you?**

If not volunteered – specifically probe about;

- How information was communicated?
- Clarity of information?
- Timing?
- What worked well?
- Were there any major problems?
- How could we improve this process?

**Were you given the opportunity to discuss this? Was this important to you?**

**What is your understanding of ‘biosimilars’?**

**What were your reasons for not wanting to take part in the switch?**

If not volunteered –

- Probe about side effects, safety, efficacy, concerns about relapse?

**Did your current clinical status influence your decision to remain on CTP-13?**

**Have you previously been involved in a switch from one type of infliximab to another? Can you tell me your experience of that?**

If not volunteered – specifically probe about;

- Was your experience good or bad?
- Did your previous experience affect your decision to not swap this time?

**In the future, it is likely that you will be asked to switch to SB2 as part of routine NHS care. Can you tell me your thoughts about that?**

**At the time the switch was first discussed with you was there anything that we could have said or done for you to reconsider this? If so, what? Can you explain a bit more for me?**

Consider things such;

- Further information/reassurance.
- By whom?
- At what time point in the process?
- In what format?

**Ending**

Is there anything else you would like to tell me today?

Turn off recorder.

Thank you.

**Supplement C:** Demographic details

|  | **UC cohort** | **CD cohort** | **Complete cohort** |
| --- | --- | --- | --- |
| Total number | 28 | 105 | 133 |
| Age – median [range] years | 43 [19-74] | 38 [18-90] | 38 [18-90] |
| Male/Female – no [%] | 16[57.1]/12[42.9] | 58 [55.2]/47 [44.8] | 74 [55.6]/59 [44.4] |
| Race – no [%]   - White - Mixed - Asian or Asian background - Black or Black British - Chinese - Other | 24 [85.7]  0 [0]  1 [3.6]  3 [10.7]  0 [0]  0 [0] | 99 [94.3]  0 [0]  4 [3.8]  2 [1.9]  0 [0]  0 [0] | 123 [92.5]  0 [0]  5 [3.8]  5 [3.8]  0 [0]  0 [0] |
| BMI – median [range] | 26.5 [19.7–40.2] | 25.4 [16.6-48.4] | 25.9 [16.6-48.4] |
| Smoking status – no [%]   - Never - Current - Previous | 21 [75.0]  0 [0]  7 [25] | 52 [49.5]  22 [21.0]  31 [29.5] | 73 [54.9]  22 [16.5]  38 [28.6] |
| Vaping status – no [%]   - Never - Current - Previous | 26 [92.9]  2 [7.1]  0 [0] | 97 [92.4]  7 [6.7]  1 [1.0] | 123 [92.5]  9 [6.8]  1 [0.8] |
| Duration of disease – median [range] years | 3 [0-38] | 8 [0-36] | 7 [0-38] |
| Age at onset – no [%]   - A1: < 16 - A2: 17-40 - A3: >40 |  | 8 [7.6]  78 [74.3]  19 [18.1] |  |
| Site of Crohn’s disease – no [%]   - L1: Ileal - L2: Colonic - L3: Ileocolonic - L4: Upper GI tract |  | 25 [23.8]  30 [28.6]  50 [47.6]  4 [3.8] |  |
| Crohn’s disease behaviour – no [%]   - B1: Non-stricturing/non-penetrating - B2: Stricturing - B3: Penetrating - p: Perianal disease |  | 65 [61.9]  16 [15.2]  24 [22.9]  17 [16.2] |  |
| Site of Ulcerative Colitis – no [%]   - E1: Proctitis - E2: Left sided - E3: Extensive | 0 [0]  14 [50.0]  14 [50.0] |  |  |
| Concomitant medications at baseline – no [%]   - Azathioprine/Mercaptopurine - Methotrexate | 11 [39.3]  6 [21.4] | 56 [53.3]  14 [13.3] | 67 [50.4]  20 [15.0] |
| Previous biologic history – no [%]   - Remicade - Adalimumab | 7 [25.0]  3 [10.7] | 45 [42.9]  16 [15.2] | 52 [39.1]  19 [14.3] |

**Supplement D:** Adverse events

|  | **UC cohort**  **n (%)** | **CD cohort**  **n (%)** | **Whole cohort n (%)** |
| --- | --- | --- | --- |
| Any adverse event | 27 | 166 | 193 |
| Severity of adverse event  Mild  Moderate  Severe | 19 [70.4]  8 [29.6]  0 [0] | 105 [63.3]  43 [25.9]  18 [10.8] | 124 [64.3]  51 [26.4]  18 [9.3] |
| Serious adverse events | 0 [0] | 16 [9.6] | 16 [8.3] |
| Fatal adverse events | 0 [0] | 0 [0] | 0 [0] |
| Adverse event leading to discontinuation of SB2 | 5 [18.5] | 12 [7.2] | 17 [8.8] |
| Adverse event associated with infusion reaction | 2 [7.4] | 0 [0] | 2 [1.0] |
| Relationship to SB2  Not related  Unlikely  Possibly  Probably | 4 [14.8]  16 [59.3]  0 [0]  7 [26.0] | 31 [18.7]  95 [57.2]  9 [5.4]  31 [18.7] | 35 [18.1]  111 [57.5]  9 [4.7]  38 [19.7] |

**Table 3: Details of adverse events.**

**Supplement E:** Qualitative cohort – detailed characteristics

| ID | Age | Sex | Education level | IBD subtype | Active disease at switch | Prev switch experience |
| --- | --- | --- | --- | --- | --- | --- |
| **G1: Group 1 – those who agreed to switch from CT-P13 to SB2 (n=16)** | | | | | | |
| G1:003 | 37 | M | PG | CD | Yes | No |
| G1:012 | 40 | F | UG | CD | No | Yes |
| G1:013 | 44 | M | UG | CD | No | Yes |
| G1:014 | 29 | M | AL | CD | No | Yes |
| G1:015 | 73 | M | None | UC | No | No |
| G1:016 | 64 | F | None | CD | No | No |
| G1:017 | 21 | F | AL | UC | No | No |
| G1:018 | 33 | F | UG | CD | No | No |
| G1:021 | 28 | M | PG | CD | No | Yes |
| G1:030 | 21 | F | UG | CD | No | Yes |
| G1:037 | 49 | M | GCSE | CD | No | Yes |
| G1:051 | 32 | M | GCSE | CD | No | No |
| G1:055 | 73 | M | None | CD | No | No |
| G1:057 | 45 | M | GCSE | CD | No | Yes |
| G1:071 | 24 | F | AL | UC | Yes | No |
| G1:082 | 45 | F | GCSE | CD | No | Yes |
| **G2: Group 2 – those who discontinued early from the trial due to their own choice (n=5)** | | | | | | |
| G2:026 | 23 | F | AL | UC | No | Yes |
| G2:038 | 43 | F | UG | CD | No | Yes |
| G2:039 | 55 | M | GCSE | CD | No | Yes |
| G2:079 | 65 | F | GCSE | CD | No | No |
| G2:105 | 25 | M | AL | CD | No | No |
| **G3: Group 3 – those who declined to switch from the outset (n=5)** | | | | | | |
| G3:BR | 21 | F | - | UC | - | No |
| G3:HW | 48 | F | - | CD | - | No |
| G3:KS | 34 | M | - | CD | - | No |
| G3:SM | 35 | F | - | CD | - | No |
| G3:SW | 69 | F | - | CD | - | No |

**Table 4: Demographics of qualitative interviewees.
PG: Postgraduate, UG: Undergraduate, AL: Advanced Level, GCSE: General Certificate of Secondary Education**
